# Supplementary material
Source: Springer Nature journal article supplement (https://www.springermedizin.de/resource/supplementary/12885_2006_556_MOESM7_ESM.pdf/9469762)

# A DU145

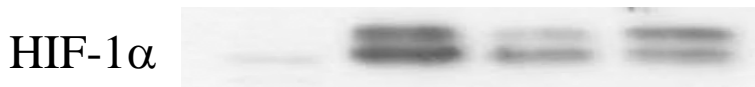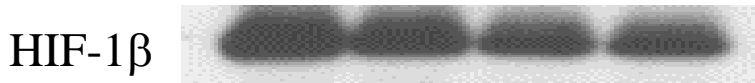

|                 |   |   |    |     |
|-----------------|---|---|----|-----|
| Hypoxia         | - | + | +  | +   |
| DCPA ( $\mu$ M) | - | - | 75 | 150 |

# B PC-3

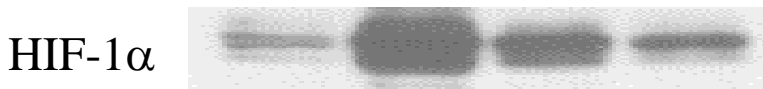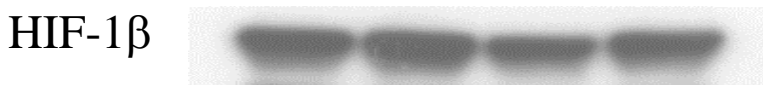

|                 |   |   |    |     |
|-----------------|---|---|----|-----|
| Hypoxia         | - | + | +  | +   |
| DCPA ( $\mu$ M) | - | - | 75 | 150 |

Supplement: MOESM7 [file 9469762]
